# Supplementary figures and images for: Evaluation of the release kinetics of hydrophilic and lipophilic compounds from lipid–polymer hybrid nanoparticles
Source: Royal Society of Chemistry journal article supplement (doi:10.1039/d4nr01358a), 2024-01-01

25 % 50 % 75 % 90 %

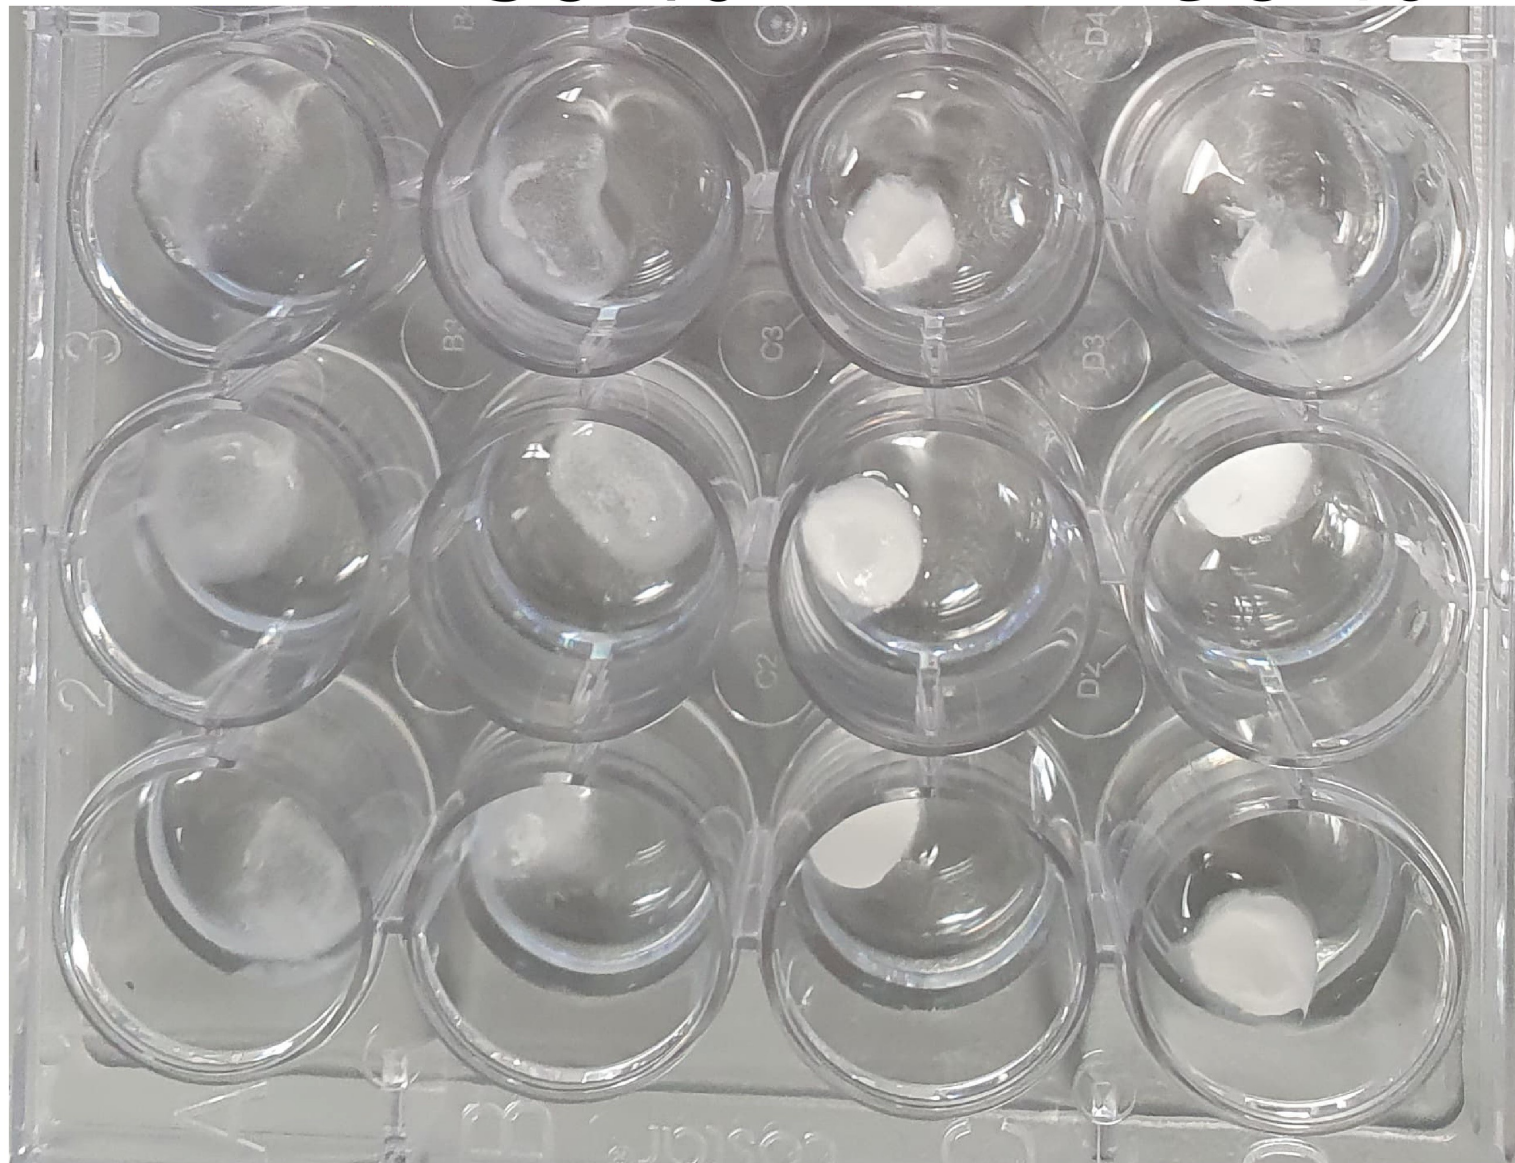

Supplement: d4nr01358a1.pdf [file d4nr01358a1.pdf]

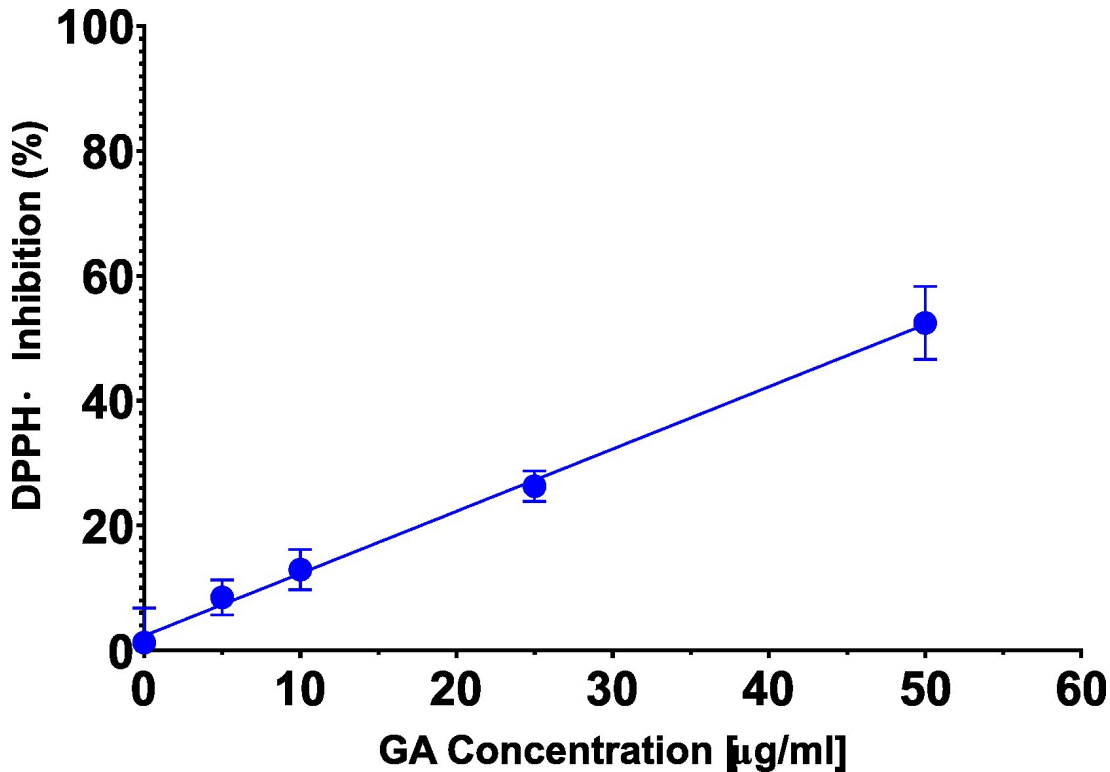

Supplement: d4nr01358a3.pdf [file d4nr01358a3.pdf]

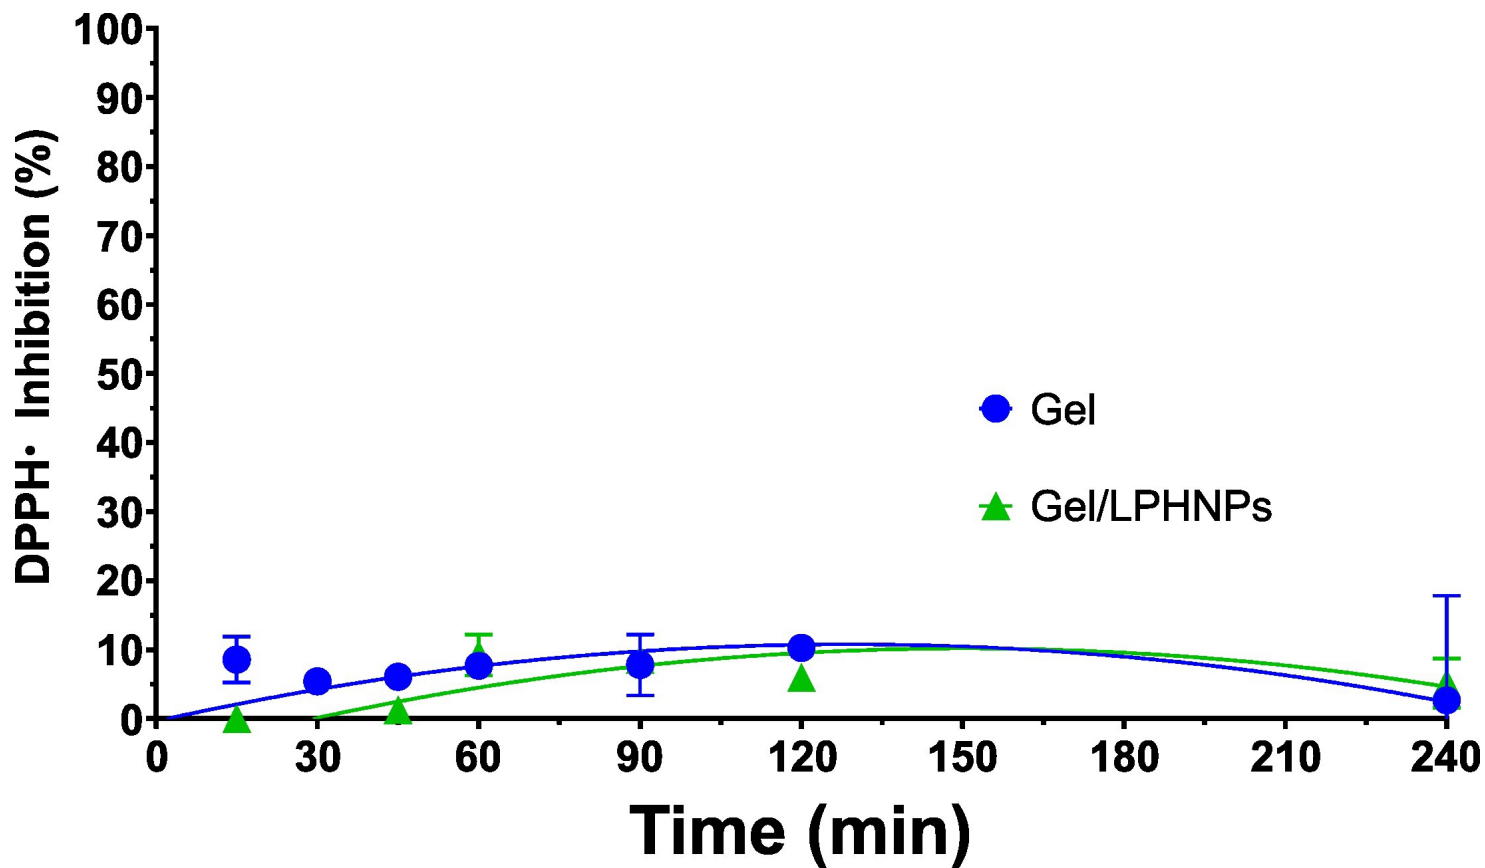

Supplement: d4nr01358a4.pdf [file d4nr01358a4.pdf]

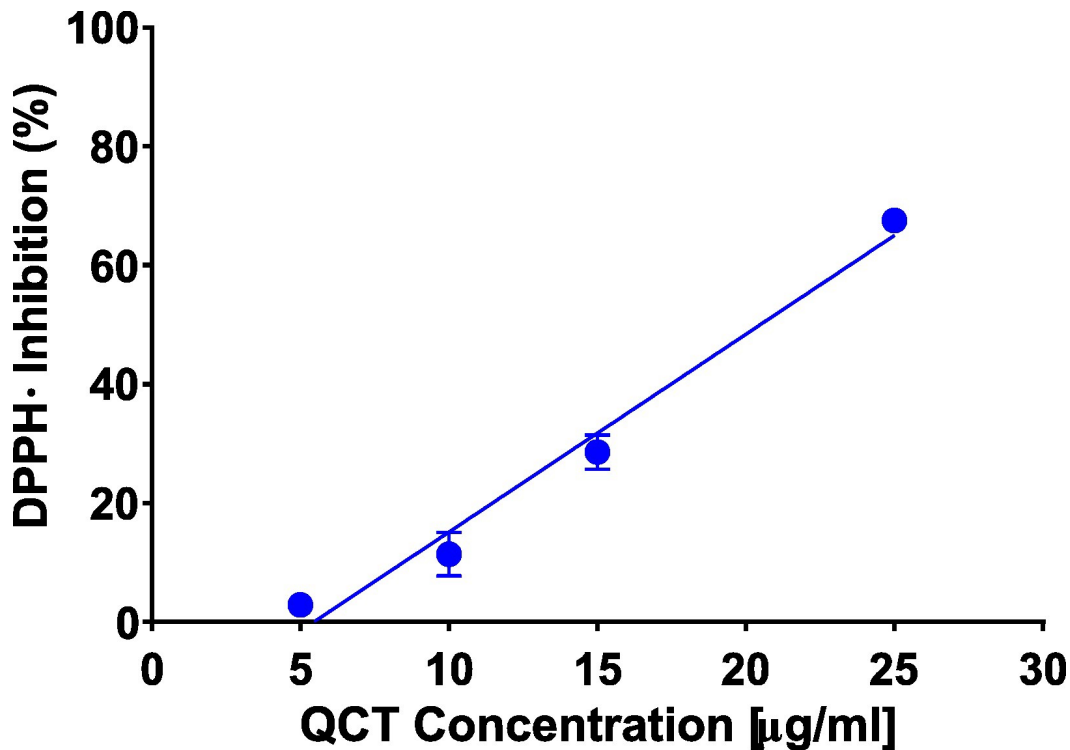

Supplement: d4nr01358a5.pdf [file d4nr01358a5.pdf]
